# Supplementary material for: Lexical Access Restrictions after the Age of 80
Source: MDPI journal article supplement (doi:10.3390/brainsci13091343), 2023-09-19
Supplement: s1 [file s1]

## List of words by experimental task

**1.Lexical decision task:** List of experimental words of high and low lexical frequency / high and low imaginability. Fillers and pseudowords are not included and were also not analyzed.

| Words<br>(2-3 syllable) | Lexical frequency<br>(1=High, 0=Low) | Imaginability<br>(1=High, 0=Low) |
|-------------------------|--------------------------------------|----------------------------------|
| Agua                    | 1                                    | 1                                |
| Niña                    | 1                                    | 1                                |
| Manos                   | 1                                    | 1                                |
| Cielo                   | 1                                    | 1                                |
| Comida                  | 1                                    | 1                                |
| Corazón                 | 1                                    | 1                                |
| Cuerpo                  | 1                                    | 1                                |
| Hija                    | 1                                    | 1                                |
| Libro                   | 1                                    | 1                                |
| Luna                    | 1                                    | 1                                |
| Madera                  | 1                                    | 1                                |
| Mujer                   | 1                                    | 1                                |
| Parque                  | 1                                    | 1                                |
| Médico                  | 1                                    | 1                                |
| Verano                  | 1                                    | 1                                |
| Capaz                   | 1                                    | 0                                |
| Intención               | 1                                    | 0                                |
| Valores                 | 1                                    | 0                                |
| Recurso                 | 1                                    | 0                                |
| Razón                   | 1                                    | 0                                |
| Real                    | 1                                    | 0                                |
| Voluntad                | 1                                    | 0                                |
| Cierto                  | 1                                    | 0                                |
| Sensación               | 1                                    | 0                                |
| Carácter                | 1                                    | 0                                |
| Conciencia              | 1                                    | 0                                |
| Causa                   | 1                                    | 0                                |
| Lógica                  | 1                                    | 0                                |
| Percepción              | 1                                    | 0                                |
| Moral                   | 1                                    | 0                                |
| Bizcocho                | 0                                    | 1                                |
| Zorzal                  | 0                                    | 1                                |
| Almeja                  | 0                                    | 1                                |

|           |   |   |
|-----------|---|---|
| Maceta    | 0 | 1 |
| Cubeta    | 0 | 1 |
| Biombo    | 0 | 1 |
| Molusco   | 0 | 1 |
| Simio     | 0 | 1 |
| Brasa     | 0 | 1 |
| Madeja    | 0 | 1 |
| Equino    | 0 | 1 |
| Bisturí   | 0 | 1 |
| Joroba    | 0 | 1 |
| Betún     | 0 | 1 |
| Morral    | 0 | 1 |
| Cuantiosa | 0 | 0 |
| Conciso   | 0 | 0 |
| Alarde    | 0 | 0 |
| Morboso   | 0 | 0 |
| Certera   | 0 | 0 |
| Indaga    | 0 | 0 |
| Agobio    | 0 | 0 |
| Abruma    | 0 | 0 |
| Sadismo   | 0 | 0 |
| Pérfido   | 0 | 0 |
| Melosa    | 0 | 0 |
| Burdo     | 0 | 0 |
| Fascina   | 0 | 0 |
| Tortuoso  | 0 | 0 |
| Sórdido   | 0 | 0 |

**2. Naming task:** List of experimental words of high and low lexical frequency / high and low positional syllable frequency (PSF) of the first syllable. Fillers and pseudowords are not included and were also not analyzed.

| Words<br>(2-3 syllable) | Lexical frequency<br>(1=High, 0=Low) | PSF<br>(1=High, 0=Low) |
|-------------------------|--------------------------------------|------------------------|
| Comer                   | 1                                    | 1                      |
| Abierto                 | 1                                    | 1                      |
| Palabras                | 1                                    | 1                      |
| Local                   | 1                                    | 1                      |
| Tomar                   | 1                                    | 1                      |
| Militar                 | 1                                    | 1                      |
| Médico                  | 1                                    | 1                      |
| Música                  | 1                                    | 1                      |
| Colegio                 | 1                                    | 1                      |
| Cabeza                  | 1                                    | 1                      |
| Casa                    | 1                                    | 1                      |
| Ministro                | 1                                    | 1                      |
| Problema                | 1                                    | 1                      |
| Saber                   | 1                                    | 1                      |
| Animal                  | 1                                    | 1                      |
| Tribu                   | 1                                    | 0                      |
| Bravo                   | 1                                    | 0                      |
| Frases                  | 1                                    | 0                      |
| Bronce                  | 1                                    | 0                      |
| Montaña                 | 1                                    | 0                      |
| Jardines                | 1                                    | 0                      |
| Barco                   | 1                                    | 0                      |
| Olvidar                 | 1                                    | 0                      |
| Castigo                 | 1                                    | 0                      |
| Cría                    | 1                                    | 0                      |
| Bruto                   | 1                                    | 0                      |
| Trono                   | 1                                    | 0                      |
| Crudo                   | 1                                    | 0                      |
| Signo                   | 1                                    | 0                      |
| Tregua                  | 1                                    | 0                      |
| Calar                   | 0                                    | 1                      |
| Nobel                   | 0                                    | 1                      |
| Empuñar                 | 0                                    | 1                      |
| Infectar                | 0                                    | 1                      |

|           |   |   |
|-----------|---|---|
| Distal    | 0 | 1 |
| Pajar     | 0 | 1 |
| Dilatar   | 0 | 1 |
| Macaco    | 0 | 1 |
| Encías    | 0 | 1 |
| Codorniz  | 0 | 1 |
| Mucosas   | 0 | 1 |
| Rebatir   | 0 | 1 |
| Tifus     | 0 | 1 |
| Profesar  | 0 | 1 |
| Sicario   | 0 | 1 |
| Palpar    | 0 | 0 |
| Polvorín  | 0 | 0 |
| Baldío    | 0 | 0 |
| Croquis   | 0 | 0 |
| Clonar    | 0 | 0 |
| Garfio    | 0 | 0 |
| Factibles | 0 | 0 |
| Brotado   | 0 | 0 |
| Captan    | 0 | 0 |
| Balsero   | 0 | 0 |
| Yerra     | 0 | 0 |
| Rencillas | 0 | 0 |
| Bujías    | 0 | 0 |
| Múltiplos | 0 | 0 |
| Bastidor  | 0 | 0 |

**3. Priming task:** List of experimental words of high and low lexical frequency / semantic-associative and ortho-phonologic prime. Fillers are not included and were also not analyzed.

| High<br>Frequency Words | Semantic/Associative<br>prime |
|-------------------------|-------------------------------|
| Doctor                  | Hospital                      |
| Cielo                   | Nubes                         |
| Planta                  | Flores                        |
| Venta                   | Negocio                       |
| Rural                   | Campo                         |
| Luna                    | Estrellas                     |
| Señor                   | Caballero                     |
| Copa                    | Vaso                          |
| Verdad                  | Sinceridad                    |
| Guerra                  | Combate                       |
| Diario                  | Revista                       |
| Reyes                   | Príncipe                      |
| Cuento                  | Novela                        |
| Viento                  | Tormenta                      |
| Lucha                   | Pelea                         |
| Amor                    | Lealtad                       |
| Abril                   | Junio                         |
| Arte                    | Escultura                     |
| Barrio                  | Población                     |
| Carne                   | Longaniza                     |

| Low<br>Frequency Words | Semantic/Associative<br>Prime |
|------------------------|-------------------------------|
| Fríjol                 | Poroto                        |
| Zurda                  | Izquierda                     |
| Panal                  | Colmena                       |
| Puercos                | Cerdos                        |
| Albo                   | Blanco                        |
| Asar                   | Hornear                       |
| Palpar                 | Tocar                         |
| Helar                  | Enfriar                       |
| Cercar                 | Alambrar                      |
| Cojín                  | Almohada                      |

|         |            |
|---------|------------|
| Hurtar  | Sustraer   |
| Cirio   | Candelabro |
| Diluir  | Disolver   |
| Hierve  | Calienta   |
| Vergel  | Huerta     |
| Betún   | Lustrín    |
| Costal  | Saco       |
| Pinchar | Punzar     |
| Toser   | Carraspear |
| Reúnen  | Congregan  |

| High<br>Frequency Words | Ortho-phonologic Prime |
|-------------------------|------------------------|
| Comer                   | Correr                 |
| Culpa                   | Culta                  |
| Terror                  | Tenor                  |
| Día                     | Tía                    |
| Cuenta                  | Cuenca                 |
| Japón                   | Jamón                  |
| Junto                   | Junco                  |
| Liga                    | Lija                   |
| Cuando                  | Cuanto                 |
| Banda                   | Banca                  |
| Hielo                   | Hierro                 |
| Llevar                  | Llenar                 |
| Renta                   | Renca                  |
| Blanco                  | Blando                 |
| Cuerpo                  | Cuerno                 |
| Marca                   | Marta                  |
| Falta                   | Falsa                  |
| Sala                    | Sana                   |
| Gana                    | Gala                   |
| Poco                    | Pozo                   |

| Low<br>Frequency Words | Ortho-phonologic Prime |
|------------------------|------------------------|
| Topar                  | Tocar                  |
| Templar                | Temblar                |

|         |         |
|---------|---------|
| Atril   | Abril   |
| Parco   | Parto   |
| Surtir  | Surgir  |
| Jarrón  | Jabón   |
| Hurgar  | Hurtar  |
| Calar   | Cavar   |
| Pegué   | Pequé   |
| Bajón   | Balón   |
| Trompo  | Trombo  |
| Rajó    | Rayó    |
| Brincar | Brindar |
| Tienta  | Tienda  |
| Zarpa   | Zarza   |
| Lanas   | Latas   |
| Bancas  | Bandas  |
| Morral  | Modal   |
| Manchar | Mandar  |
| Fuman   | Fugan   |

**4. Picture Naming task:** List of experimental words of high and low lexical frequency / bysyllable, trisyllable and tetrasyllable. Fillers are not included and were also not analyzed.

| Words    | Frequency<br>(1= High/ 0=Low) | Number of syllables |
|----------|-------------------------------|---------------------|
| Avión    | 1                             | 2                   |
| Hojas    | 1                             | 2                   |
| Huesos   | 1                             | 2                   |
| Huevos   | 1                             | 2                   |
| Perro    | 1                             | 2                   |
| Nariz    | 1                             | 2                   |
| Nido     | 1                             | 2                   |
| Niños    | 1                             | 2                   |
| Puerta   | 1                             | 2                   |
| Reloj    | 1                             | 2                   |
| Tigre    | 1                             | 2                   |
| León     | 1                             | 2                   |
| Mapa     | 1                             | 2                   |
| Radio    | 1                             | 2                   |
| Arroz    | 1                             | 2                   |
| Carta    | 1                             | 2                   |
| Chino    | 1                             | 2                   |
| Hielo    | 1                             | 2                   |
| Indio    | 1                             | 2                   |
| Reina    | 1                             | 2                   |
| Botella  | 1                             | 3                   |
| Anillo   | 1                             | 3                   |
| Árboles  | 1                             | 3                   |
| Bandera  | 1                             | 3                   |
| Caballo  | 1                             | 3                   |
| Cadena   | 1                             | 3                   |
| Cocina   | 1                             | 3                   |
| Familia  | 1                             | 3                   |
| Guitarra | 1                             | 3                   |
| Antena   | 1                             | 3                   |
| Oveja    | 1                             | 3                   |
| Sombrero | 1                             | 3                   |
| Ventana  | 1                             | 3                   |
| Aceite   | 1                             | 3                   |



|              |   |   |
|--------------|---|---|
| Espejo       | 1 | 3 |
| Zapatos      | 1 | 3 |
| Monedas      | 1 | 3 |
| Oreja        | 1 | 3 |
| Ajedrez      | 1 | 3 |
| Iglesia      | 1 | 3 |
| Chocolate    | 1 | 4 |
| Herramientas | 1 | 4 |
| Calendario   | 1 | 4 |
| Presidente   | 1 | 4 |
| Cementerio   | 1 | 4 |
| Escalera     | 1 | 4 |
| Teléfono     | 1 | 4 |
| Edificio     | 1 | 4 |
| Uniforme     | 1 | 4 |
| Zapatero     | 1 | 4 |
| Animales     | 1 | 4 |
| Diccionario  | 1 | 4 |
| Pescadores   | 1 | 4 |
| Secretaria   | 1 | 4 |
| Policía      | 1 | 4 |
| Oficina      | 1 | 4 |
| Batería      | 1 | 4 |
| Cerámica     | 1 | 4 |
| Futbolista   | 1 | 4 |
| Televisor    | 1 | 4 |
| Ají          | 0 | 2 |
| Apio         | 0 | 2 |
| Cebra        | 0 | 2 |
| Gorros       | 0 | 2 |
| Peras        | 0 | 2 |
| Pito         | 0 | 2 |
| Sartén       | 0 | 2 |
| Carnet       | 0 | 2 |
| Confort      | 0 | 2 |
| Cojín        | 0 | 2 |
| Brocha       | 0 | 2 |
| Habas        | 0 | 2 |
| Pinza        | 0 | 2 |

|            |   |   |
|------------|---|---|
| Grifos     | 0 | 2 |
| Higos      | 0 | 2 |
| Maní       | 0 | 2 |
| Betún      | 0 | 2 |
| Hippie     | 0 | 2 |
| Pulpo      | 0 | 2 |
| Yogur      | 0 | 2 |
| Candado    | 0 | 3 |
| Espuela    | 0 | 3 |
| Durazno    | 0 | 3 |
| Erizo      | 0 | 3 |
| Estuche    | 0 | 3 |
| Fósforos   | 0 | 3 |
| Carrusel   | 0 | 3 |
| Ardilla    | 0 | 3 |
| Velador    | 0 | 3 |
| Canguro    | 0 | 3 |
| Pepino     | 0 | 3 |
| Almejas    | 0 | 3 |
| Pesebre    | 0 | 3 |
| Bombones   | 0 | 3 |
| Calzones   | 0 | 3 |
| Champaña   | 0 | 3 |
| Jarabe     | 0 | 3 |
| Medusa     | 0 | 3 |
| Medidor    | 0 | 3 |
| Parlantes  | 0 | 3 |
| Basurero   | 0 | 4 |
| Espárragos | 0 | 4 |
| Herraduras | 0 | 4 |
| Carretilla | 0 | 4 |
| Ventilador | 0 | 4 |
| Mayonesa   | 0 | 4 |
| Semáforo   | 0 | 4 |
| Almohadas  | 0 | 4 |
| Azafata    | 0 | 4 |
| Mermelada  | 0 | 4 |
| Neumático  | 0 | 4 |
| Remolino   | 0 | 4 |

|            |   |   |
|------------|---|---|
| Servilleta | 0 | 4 |
| Urinario   | 0 | 4 |
| Aceituna   | 0 | 4 |
| Aspirina   | 0 | 4 |
| Calcetines | 0 | 4 |
| Ensaladas  | 0 | 4 |
| Candelabro | 0 | 4 |
| Orégano    | 0 | 4 |
