# Supplementary material for: Lexical Access Restrictions after the Age of 80
Source: MDPI journal article supplement (doi:10.3390/brainsci13091343), 2023-09-19
Supplement: s1 [file s1]

# **LEXICAL FREQUENCY BY WORDS (ESPAL)**

| <b>WORD</b> | <b>HIGH FREQUENCY</b> | <b>WORD</b> | <b>LOW FREQUENCY</b> |
|-------------|-----------------------|-------------|----------------------|
| abierto     | 68,085                | abruma      | 0,601                |
| abril       | 185,513               | aceituna    | 1,283                |
| aceite      | 25,427                | agobio      | 0,747                |
| agua        | 277,367               | ají         | 1,147                |
| ajedrez     | 14,205                | alarde      | 1,566                |
| amor        | 208,368               | albo        | 0,666                |
| anillo      | 23,693                | almeja      | 0,884                |
| animal      | 67,202                | almejas     | 0,647                |
| animales    | 118,048               | almohadas   | 1,407                |
| antena      | 19,144                | apio        | 1,095                |
| arroz       | 18,328                | ardilla     | 1,372                |
| arte        | 163,874               | asar        | 0,777                |
| avión       | 48,100                | aspirina    | 1,001                |
| banda       | 179,620               | atril       | 0,673                |
| bandera     | 48,091                | azafata     | 1,062                |
| barco       | 42,739                | bajón       | 0,939                |
| barrio      | 81,765                | baldío      | 0,686                |
| batería     | 35,052                | balsero     | 0,926                |
| blanco      | 127,861               | bancas      | 0,718                |
| botella     | 15,619                | bastidor    | 0,773                |
| bravo       | 16,766                | basurero    | 0,799                |
| bronce      | 30,159                | betún       | 0,647                |
| bruto       | 14,959                | biombo      | 0,822                |
| caballo     | 82,493                | bisturí     | 0,754                |
| cabeza      | 220,039               | bizcocho    | 0,832                |
| cadena      | 68,664                | bombones    | 0,858                |

|            |         |            |       |
|------------|---------|------------|-------|
| calendario | 30,012  | brasa      | 1,515 |
| capaz      | 92,315  | brincar    | 0,874 |
| carne      | 78,870  | brocha     | 0,617 |
| carta      | 121,538 | brotado    | 0,790 |
| carácter   | 153,643 | bujías     | 0,783 |
| casa       | 403,590 | burdo      | 0,871 |
| castigo    | 26,230  | calar      | 0,760 |
| causa      | 174,502 | calcetines | 1,527 |
| cementerio | 23,095  | calzones   | 1,465 |
| cerámica   | 14,754  | candado    | 1,066 |
| chino      | 29,983  | candelabro | 0,952 |
| chocolate  | 14,514  | canguro    | 0,981 |
| cielo      | 103,583 | captan     | 0,796 |
| cierto     | 212,664 | carnet     | 1,322 |
| cocina     | 38,593  | carretilla | 0,832 |
| colegio    | 65,038  | carrusel   | 0,975 |
| comer      | 67,735  | cebra      | 1,277 |
| comida     | 49,939  | cercar     | 0,621 |
| conciencia | 90,161  | certera    | 0,991 |
| copa       | 117,710 | champaña   | 1,573 |
| corazón    | 148,457 | cirio      | 0,728 |
| crudo      | 14,199  | clonar     | 0,601 |
| cría       | 14,244  | codorniz   | 0,946 |
| cuando     | 326,414 | cojín      | 0,903 |
| cuenta     | 322,721 | conciso    | 0,981 |
| cuento     | 30,480  | confort    | 1,429 |
| cuerpo     | 244,307 | costal     | 0,939 |
| culpa      | 42,366  | croquis    | 0,777 |
| diario     | 99,447  | cuantiosa  | 0,751 |

|             |         |            |       |
|-------------|---------|------------|-------|
| diccionario | 17,477  | cubeta     | 0,881 |
| doctor      | 67,270  | dilatar    | 0,871 |
| día         | 418,513 | diluir     | 0,988 |
| edificio    | 90,863  | distal     | 0,997 |
| escalera    | 22,751  | durazno    | 1,387 |
| espejo      | 26,273  | empuñar    | 0,855 |
| falta       | 193,412 | encías     | 0,679 |
| familia     | 277,153 | ensaladas  | 1,322 |
| frases      | 20,057  | equino     | 0,835 |
| futbolista  | 32,147  | erizo      | 1,521 |
| gana        | 38,119  | espuela    | 0,832 |
| guerra      | 346,495 | espárragos | 0,926 |
| guitarra    | 53,887  | estuche    | 1,477 |
| herramienta | 29,580  | factibles  | 0,864 |
| hielo       | 30,201  | fascina    | 0,920 |
| hija        | 125,053 | fríjol     | 0,751 |
| hojas       | 50,846  | fuman      | 0,686 |
| huesos      | 20,808  | fósforos   | 1,108 |
| huevos      | 23,716  | garfio     | 0,767 |
| iglesia     | 216,325 | gorros     | 0,984 |
| indio       | 20,408  | grifos     | 0,725 |
| intención   | 77,067  | habas      | 1,538 |
| japón       | 74,594  | helar      | 0,689 |
| jardines    | 18,582  | herraduras | 0,767 |
| junto       | 344,800 | hierve     | 0,955 |
| león        | 102,423 | higos      | 1,550 |
| libro       | 210,867 | hippie     | 1,030 |
| liga        | 117,720 | hurgar     | 0,653 |
| llevar      | 120,959 | hurtar     | 0,738 |

|            |         |           |       |
|------------|---------|-----------|-------|
| local      | 115,179 | indaga    | 0,861 |
| lucha      | 167,517 | infectar  | 0,760 |
| luna       | 67,641  | jarabe    | 1,525 |
| lógica     | 40,017  | jarrón    | 0,952 |
| madera     | 60,460  | joroba    | 0,855 |
| manos      | 197,591 | lanas     | 0,890 |
| mapa       | 23,813  | macaco    | 0,689 |
| marca      | 63,537  | maceta    | 0,806 |
| militar    | 175,714 | madeja    | 0,816 |
| ministro   | 241,090 | manchar   | 0,738 |
| monedas    | 22,221  | maní      | 1,287 |
| montaña    | 42,151  | mayonesa  | 0,608 |
| moral      | 68,232  | medidor   | 0,702 |
| mujer      | 287,992 | medusa    | 1,423 |
| médico     | 75,722  | melosa    | 0,796 |
| música     | 217,287 | mermelada | 1,079 |
| nariz      | 20,281  | molusco   | 0,617 |
| nido       | 18,254  | morboso   | 0,634 |
| niña       | 38,005  | morral    | 0,650 |
| niños      | 115,975 | mucosas   | 0,838 |
| oficina    | 51,502  | múltiplos | 0,871 |
| olvidar    | 34,698  | neumático | 1,410 |
| oreja      | 21,012  | nobel     | 1,279 |
| oveja      | 20,925  | orégano   | 0,773 |
| palabras   | 216,182 | pajar     | 0,621 |
| parque     | 88,315  | palpar    | 0,770 |
| percepción | 23,348  | panal     | 0,936 |
| perro      | 69,971  | parco     | 0,796 |
| pescadores | 17,861  | parlantes | 0,939 |

|            |         |            |       |
|------------|---------|------------|-------|
| planta     | 75,647  | pegué      | 0,604 |
| poco       | 112,684 | pepino     | 1,518 |
| policía    | 153,087 | peras      | 1,512 |
| presidente | 412,261 | pesebre    | 1,415 |
| problema   | 220,286 | pinchar    | 0,900 |
| puerta     | 158,978 | pinza      | 1,023 |
| radio      | 104,080 | pito       | 1,495 |
| razón      | 212,192 | polvorín   | 0,936 |
| real       | 309,384 | profesar   | 0,926 |
| recurso    | 83,331  | puercos    | 0,777 |
| reina      | 92,949  | pulpo      | 1,446 |
| reloj      | 26,146  | pérfido    | 0,816 |
| renta      | 42,970  | rajó       | 0,617 |
| reyes      | 70,081  | rebatir    | 0,881 |
| rural      | 45,238  | remolino   | 1,484 |
| saber      | 169,190 | rencillas  | 0,894 |
| sala       | 108,603 | reúnen     | 1,462 |
| secretaria | 17,500  | sadismo    | 0,780 |
| sensación  | 40,345  | sartén     | 1,496 |
| señor      | 49,052  | semáforo   | 1,473 |
| signo      | 27,546  | servilleta | 1,248 |
| sombrero   | 21,272  | sicario    | 0,608 |
| televisor  | 33,782  | simio      | 0,984 |
| teléfono   | 33,664  | surtir     | 0,864 |
| terror     | 35,796  | sórdido    | 0,783 |
| tigre      | 26,474  | templar    | 0,955 |
| tomar      | 134,378 | tienta     | 0,630 |
| tregua     | 15,427  | tifus      | 0,942 |
| tribu      | 20,051  | topar      | 0,624 |

|          |         |
|----------|---------|
| trono    | 37,853  |
| uniforme | 30,532  |
| valores  | 107,043 |
| venta    | 70,178  |
| ventana  | 41,566  |
| verano   | 83,302  |
| verdad   | 202,744 |
| viento   | 67,017  |
| voluntad | 125,164 |
| zapatero | 43,646  |
| zapatos  | 14,036  |
| árboles  | 52,903  |

X= 96,568

|            |       |
|------------|-------|
| tortuoso   | 0,955 |
| toser      | 0,744 |
| trompo     | 0,660 |
| urinario   | 0,679 |
| velador    | 0,627 |
| ventilador | 1,144 |
| vergel     | 0,871 |
| yerra      | 0,790 |
| yogur      | 1,017 |
| zarpa      | 0,692 |
| zorzal     | 0,611 |
| zurda      | 0,838 |

X= 0,950
