# Supplementary material for: Lexical Access Restrictions after the Age of 80
Source: MDPI journal article supplement (doi:10.3390/brainsci13091343), 2023-09-19

# Configuration of experimental trials for each lexical task

## Lexical Decision Task

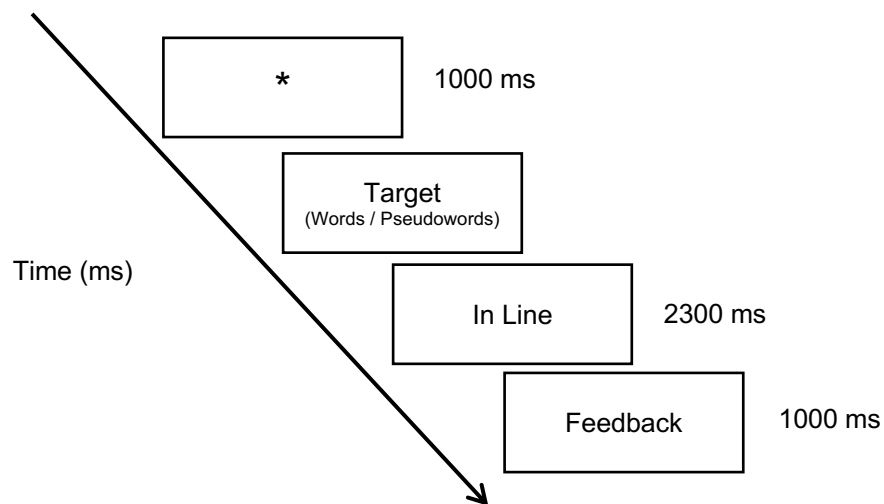

## Naming Task

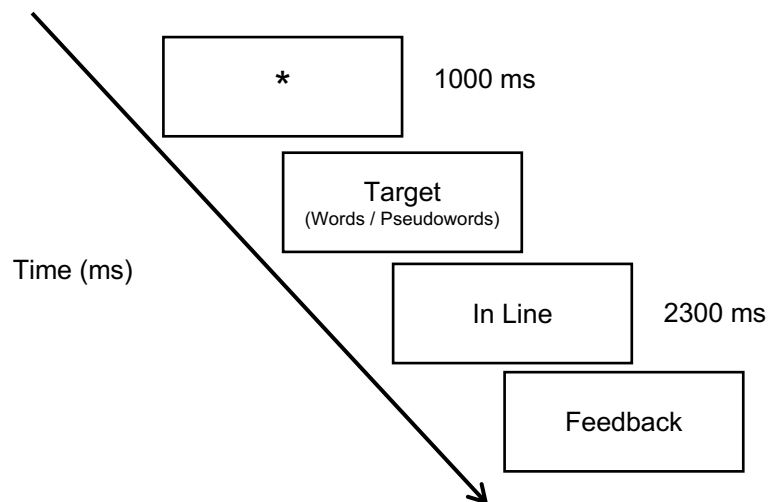

## Priming Task

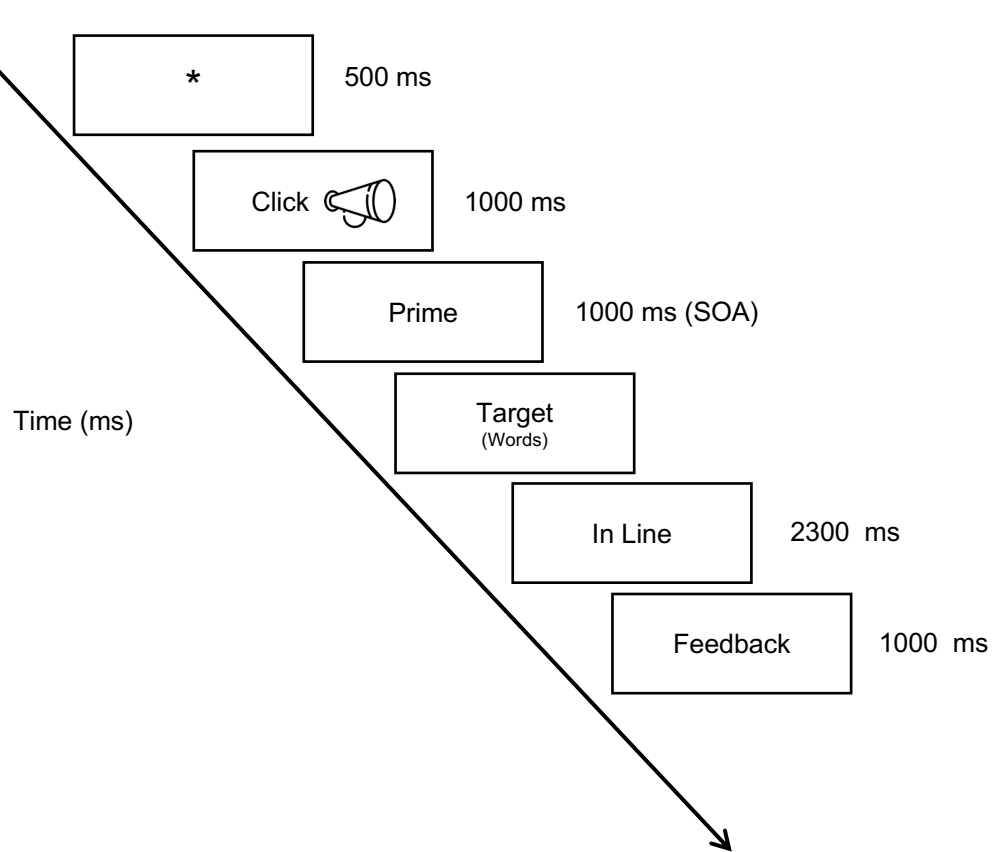

## Picture Naming Task

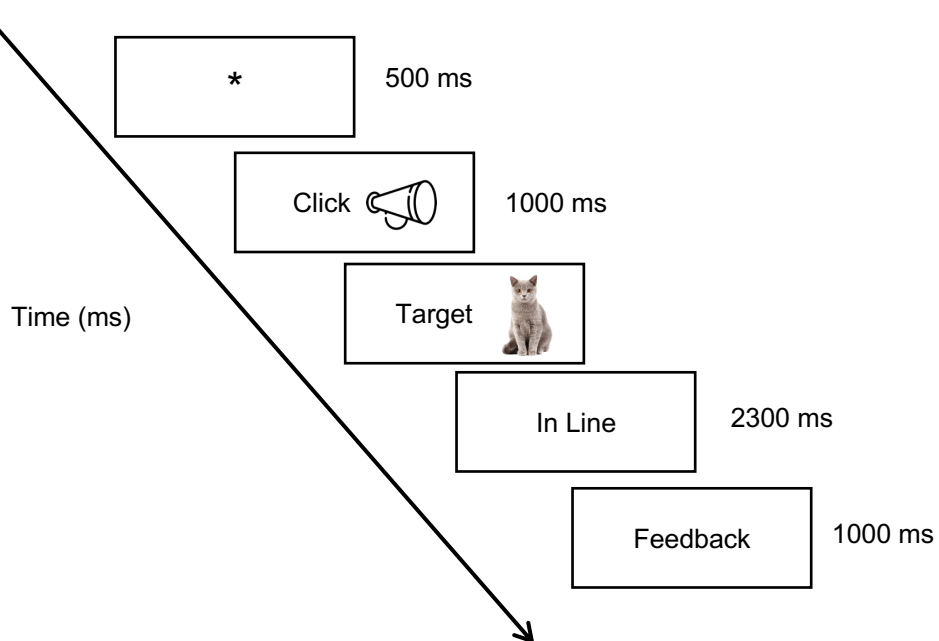

Supplement: s1 [file s1]
